# Supplementary material for: Ultrahigh photo-responsivity and detectivity in multilayer InSe nanosheets phototransistors with broadband response
Source: Royal Society of Chemistry journal article supplement (doi:10.1039/c5tc01208b), 2015-01-01
Supplement: c5tc01208b1.pdf [file c5tc01208b1.pdf]

## Supporting information

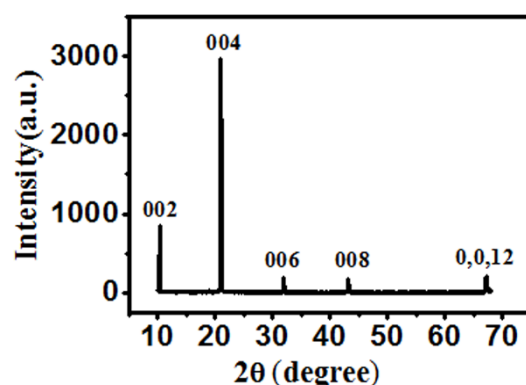

**Figure S1.** XRD of the as-prepared InSe crystal, showing  $\beta$ -type structure.

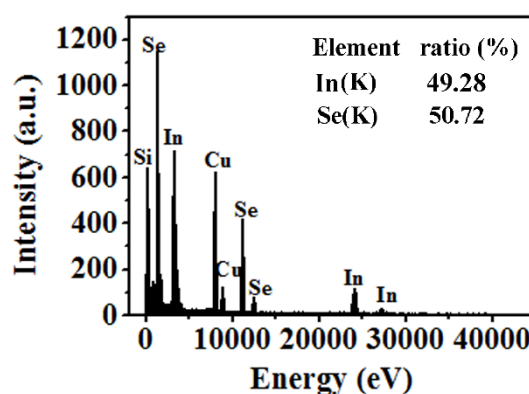

**Figure S2.** Chemical compositions of InSe crystals are composed of indium and Selenide with an atomic ratio of 1:1 by using EDS combined with Transmission Electron Microscope (TEM). Si and Cu peaks are from the TEM grid which is used to support InSe sample for TEM observation.

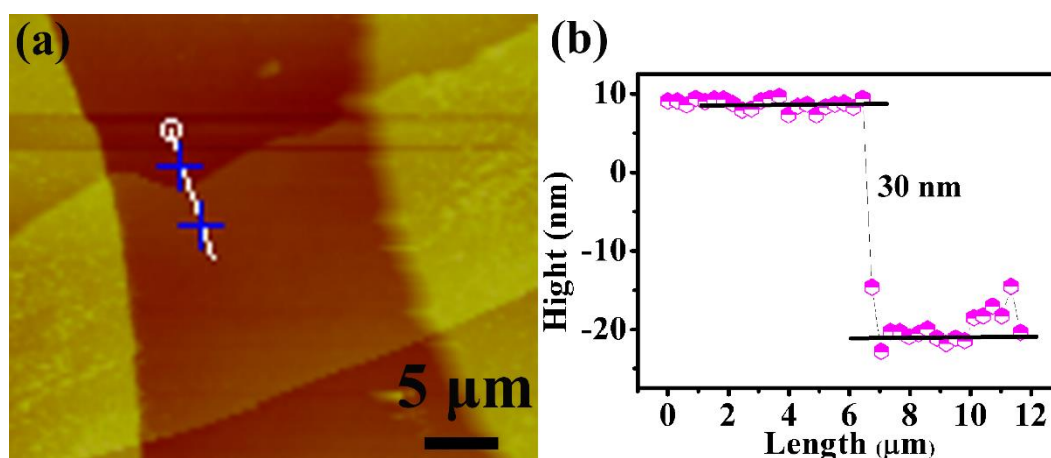

**Figure S3.** (a) AFM image of multilayer InSe FETs; (b) AFM height profile multilayer InSe FETs (30 nm).

**Table S1. Comparison of the critical parameters for photodetectors based on 2D materials**

| Photodetectors                      | Responsivity ( $\text{AW}^{-1}$ ) | Detectivity (Jones) | Reference |
|-------------------------------------|-----------------------------------|---------------------|-----------|
| Single layer $\text{MoS}_2$         | 880                               |                     | 17        |
| Multilayer GaTe                     | $10^4$                            |                     | 20        |
| Multilayer GaSe                     | 2.8                               |                     | 14        |
| Multilayer GaS                      | 19.2                              | $10^{13}$           | 15        |
| Multilayer $\text{In}_2\text{Se}_3$ | 395                               | $10^{12}$           | 19        |
| Multilayer InSe                     | $10^4$                            | $10^{13}$           | this work |
